# Supplementary material for: New biomarkers for checkpoint inhibitor therapy
Source: PubMed Central journal article supplement — ESMO Open. 2020 Sep 15;5(Suppl 1):e000597. doi: 10.1136/esmoopen-2019-000597 (PMC7493090; doi:10.1136/esmoopen-2019-000597), 2020-09-15
Supplement: esmoopen-2019-000597supp001.pdf [file esmoopen-2019-000597supp001.pdf]

| Biomarker                              | Study – first author | Patients (denominator) | Data type        | Results                                                                                                                                                                                                                                                                                                 | Population                        |
|----------------------------------------|----------------------|------------------------|------------------|---------------------------------------------------------------------------------------------------------------------------------------------------------------------------------------------------------------------------------------------------------------------------------------------------------|-----------------------------------|
| <b>Conventional serum indices</b>      |                      |                        |                  |                                                                                                                                                                                                                                                                                                         |                                   |
| <b>Lymphocyte indices</b>              | Karantanos, 2019     | 22                     | Retrospective    | ALC positively correlated with OS ( $R^2=0.28$ , Coeff = 1.54)                                                                                                                                                                                                                                          | NSCLC                             |
|                                        | Maltese, 2017        | 40                     | Retrospective    | NLR negatively correlated with OS ( $P = 0.0494$ , $R^2 = 0.28$ , Coeff = - 0.43)                                                                                                                                                                                                                       | Various                           |
|                                        | Ho, 2018             | 34                     | Retrospective    | Median TTP significantly longer in patients with ALC $\geq 1000/mm^3$ ( $p=0.01$ )                                                                                                                                                                                                                      | HNSCC                             |
|                                        | Saravia, 2018        | 107                    | Retrospective    | Median PFS 60 vs 141 days, $p=0.03$ in patients with ALC $<600$                                                                                                                                                                                                                                         | NSCLC                             |
|                                        | Ren, 2019            | 147                    | Retrospective    | Median OS = NR good; 15.1mths (CI: 9.5-21.0) intermediate and 3.2mths (CI: 2.5-4.0) poor group                                                                                                                                                                                                          | NSCLC                             |
|                                        | Wang, 2018           | 183                    | Retrospective    | NLR $\leq 2.5$ significantly favourable OS ( $p=0.009$ ) and PFS ( $p=0.017$ ) vs NLR $>2.5$                                                                                                                                                                                                            | NSCLC                             |
|                                        | Soyano, 2018         | 157                    | Retrospective    | NLR $\geq 2.5$ significantly favourable OS ( $p=0.003$ ) and PFS ( $p=0.001$ ) vs NLR $>2.5$ where TMB $>10$ but not signif in TMB $\leq 10$                                                                                                                                                            | NSCLC                             |
|                                        | Ferrucci, 2016       | 720                    | Prospective      | NLR $\geq 5$ - OS HR 1.76 ( $p<0.01$ in multivariate analysis)                                                                                                                                                                                                                                          | Melanoma                          |
| <b>Lactate dehydrogenase</b>           | Kelderman, 2014      | 166                    | Retrospective    | NLR $\geq 5.9$ - OS HR 1.94 (CI 1.24-3.03; $p=0.004$ )                                                                                                                                                                                                                                                  | Melanoma                          |
|                                        | Nosrati, 2017        | 315                    | Retrospective    | NLR $\geq 3$ - OS HR 2.29; CI 1.86-2.82; $p<0.0001$                                                                                                                                                                                                                                                     | Melanoma                          |
|                                        | Ferrucci, 2016       | 460 (720)              | Prospective      | RR 9% vs 23% in patients with elevated vs normal LDH; LDH strongest predictive factor for OS in multivariate analysis                                                                                                                                                                                   | Melanoma                          |
|                                        | Mezquita, 2018       | 431(466)               | Retrospective    | OR for high LDH and response to ipilimumab = 0.48 (CI 0.25-0.90); $p=0.02$<br>OS HR 13.24 (CI 8.10 - 21.66); $p<0.0001$ for patients with high ANC, NLR and LDH<br>LDH $>ULN$ - HR, 2.51 (95% CI, 1.32-4.76);<br>dNLR $>3$ + LDH $>ULN$ vs not - mOS 4.8 (95% CI 3.6-7.7) vs 16.5 (95% CI 11.4-34) mths | NSCLC                             |
| <b>Tumoural factors</b>                |                      |                        |                  |                                                                                                                                                                                                                                                                                                         |                                   |
| <b>EBV</b>                             | Kim, 2018            | 6 (61)                 | Prospective      | All 6 patients achieved PR; median DOR 8.5 months                                                                                                                                                                                                                                                       | Gastric                           |
| <b>Tumour infiltrating lymphocytes</b> | Tumeh, 2014          | 46                     | Prospective      | Higher CD8+ T cell density in responding patients vs progressing patients;<br>ROC AUC CD8+ density at tumour 0.91 (95% CI 0.81-1.00; $p<0.001$ ) and invasive margin 0.94 (0.88-1.00; $p<0.001$ )                                                                                                       | Melanoma                          |
|                                        | Daud, 2016           | 40                     | Retrospective    | PFS 31.6 mths vs 9.6 mths for tumours with $>20\%$ vs $\leq 20\%$ CTLA-4 $^+$ , PD-1 $^+$ CD8+ TILs ( $p=0.017$ ); ORR 85.7% vs 0%                                                                                                                                                                      | Melanoma                          |
| <b>Host factors</b>                    |                      |                        |                  |                                                                                                                                                                                                                                                                                                         |                                   |
| <b>Gut microbiome</b>                  | Matson, 2018         | 42                     | Prospective      | Spearman's coefficient Bifidobacterium longum = 0.83 ( $p<0.0001$ ); full results tabulated                                                                                                                                                                                                             | Melanoma                          |
|                                        | Gopalkrishnan, 2018  | 43                     | Prospective      | High vs intermediate diversity (HR 3.60, 95% CI 1.02 to 12.74); high vs low (HR 3.57, 95% CI 1.02 to 12.52)                                                                                                                                                                                             | Melanoma                          |
|                                        | Jin, 2018            | 37                     | Prospective      | High vs low diversity - median PFS 209 versus 52 days, $p = 0.005$                                                                                                                                                                                                                                      | NSCLC                             |
| <b>Genetic Polymorphisms</b>           | Chaput, 2017         | 26                     | Prospective      | Overall microbial composition ROC AUC = 0.77                                                                                                                                                                                                                                                            | Melanoma                          |
|                                        | Chowell, 2018        | 1535                   | Not stated       | Homozgosity at HLA-I locus - OS HR = 1.38 (95% CI 1.11 to 1.70; $p=0.003$ )                                                                                                                                                                                                                             | Melanoma, NSCLC                   |
|                                        | Vargas, 2018         | 155                    | Patient datasets | OS for low neoantigen burden + CD16A-V158F-SNP HR = 0.247 (95% CI, 0.074-0.826) $p = 0.014$                                                                                                                                                                                                             | Melanoma                          |
| <b>Research markers</b>                |                      |                        |                  |                                                                                                                                                                                                                                                                                                         |                                   |
| <b>Interleukin-6</b>                   | Weber, 2019          | Not stated             | Prospective      | Elevated serum IL-6 at baseline associated with shorter survival in patients receiving nivolumab ( $p = 0.003$ and ipilimumab ( $p = 0.0001$ ))                                                                                                                                                         | Melanoma                          |
| <b>T-cell receptor clonality</b>       | Postow, 2015         | 12                     | Retrospective    | Hierarchical clustering analysis. Patients who achieved clinical benefit had higher TCR richness and evenness ( $p=.033$ , $p=0.028$ );                                                                                                                                                                 | Melanoma                          |
|                                        | Tumeh, 2014          | 23 (46)                | Prospective      | No difference in OS between high vs low richness or evenness ( $P=0.218$ , $p = 0.26$ )<br>Restricted TCR beta chain usage correlates with radiological response $p=0.004$                                                                                                                              | Melanoma                          |
| <b>Peripheral blood PD-1/PD-L1</b>     | Arrieta, 2017        | 70                     | Prospective      | OS HR for % T-lymphocytes: PD-1 HR 1.193 (CI 0.855-1.665; $p = 0.299$ ); PD-L1 HR 1.248 (CI 1.106-1.41; $p<0.0001$ ); PD-L2 HR 1.37 (CI 1.075-1.745; $p = 0.011$ )                                                                                                                                      | NSCLC                             |
|                                        | Gros, 2016           | 3 (4)                  | Not stated       | Circulating CD8+PD-1+ cells from subject NCI-3784 recognized $\geq 3$ neoantigens; NCI-3903, 1; NCI-3926, none                                                                                                                                                                                          | Melanoma                          |
| <b>Cell-free DNA</b>                   | Gandara, 2018        | 794 (1070)             | Prospective      | PPV between blood and tumour TMB 93.5%;<br>Validation cohort: PFS HR bTMB $\geq 16 = 0.65$ (CI 0.47-0.92; $p=0.013$ ); OS HR bTMB $\geq 16 = 0.64$ (CI 0.44-0.92); $p = 0.017$                                                                                                                          | NSCLC                             |
|                                        | Wang, 2019           | 98                     | Retrospective    | bTMB $\geq 6$ vs $<6$ PFS HR 0.44 (0.20 - 0.99; $p=0.05$ )(multivariate analysis)                                                                                                                                                                                                                       | NSCLC                             |
|                                        | AstraZeneca, 2019    | not published          | Prospective      | ORR OR 11.69 (95% CI 2.16-111.6; $p=0.01$ )<br>Primary endpoint OS in patients with bTMB $\geq 20$ mut/Mb not met                                                                                                                                                                                       | NSCLC                             |
| <b>Gene Expression Profiling</b>       |                      |                        |                  |                                                                                                                                                                                                                                                                                                         |                                   |
| <b>PTEN inactivation</b>               | Miao, 2018           | 14 (249)               | Retrospective    | All patients with homozygous PTEN deletion appeared intrinsically resistant to ICI; clonal biallelic loss of PTEN less strongly associated                                                                                                                                                              | Advanced solid tumours            |
|                                        | George, 2017         | 1                      | case report      | Treatment-resistant metastasis harboured biallelic PTEN loss, unique to treatment resistant tumour                                                                                                                                                                                                      | Leiomyosarcoma                    |
| <b>POLE mutations</b>                  | Mehnert, 2016        | 1                      | case report      | Sustained partial response (14 months at publication) after treatment with pembrolizumab; hybrid-capture-based comprehensive genomic profiling - POLE V411L mutation and R114 VUS                                                                                                                       | Endometrial carcinoma             |
|                                        | Santin, 2016         | 1                      | case report      | Sustained partial response (7 months at publication) after treatment with nivolumab; POLE P286R mutation                                                                                                                                                                                                | Endometrial carcinoma             |
|                                        | Gong, 2017           | 1                      | case report      | Reduction in tumour burden after treatment with pembrolizumab; POLE V411L mutation                                                                                                                                                                                                                      | Colorectal adenocarcinoma         |
|                                        | Song, 2018           | 1(9)                   | case report      | Median TMB higher than wildtype POLE - (12.2/Mb vs 7.8/Mb; $p=0.026$ )<br>Only 1 patient treated with ICI (atezolizumab) - partial response                                                                                                                                                             | NSCLC                             |
| <b>KRAS/STK11 co-mutation</b>          | Skoulidis, 2018      | 54(174) primary cohort | Mixed            | ORR KL 7.4%; KP35.7%; K-only 28.6%; PFS HR KL vs STK11 wildtype HR 1.87 (CI 1.32-2.66; $p<0.001$ )                                                                                                                                                                                                      | NSCLC with KRAS mutation          |
|                                        | Ock, 2017            | Not stated             | Mixed            | OS KL vs STK11 wildtype = HR 1.99 (CI 1.29-3.06; $p=0.0015$ )                                                                                                                                                                                                                                           | D = melanoma; V = 30 tumour types |
|                                        | Ayers, 2017          | 220                    | Prospective      | ROC for predictive model used in patients receiving ipilimumab: AUC 0.7, $p=0.02$                                                                                                                                                                                                                       | Nine tumour types                 |
| <b>Mutational signatures</b>           | Fehrenbacher, 2016   | 112                    | Prospective      | ROC AUC 0.80 (CI 0.61-0.95 for HNSCC, 0.66 (CI 0.47-0.83) for gastric cancer<br>T effector-interferon gamma signature inc expression - OS HR 0.43 (CI 0.24-0.77) in patients receiving atezolizumab                                                                                                     | NSCLC                             |
